# Supplementary material
Source: Springer Nature journal article supplement (https://www.springermedizin.de/resource/supplementary/12998_2009_105_MOESM9_ESM.pdf/9623626)
Supplement: MOESM9 [file 9623626]

| Non-Musculoskeletal Conditions | Intervention                          | Evidence     |          |      |
|--------------------------------|---------------------------------------|--------------|----------|------|
|                                |                                       | Inconclusive | Moderate | High |
| Asthma                         | Spinal manipulation                   |              | negative |      |
| Asthma                         | Osteopathic manipulative therapy(OMT) | favorable    |          |      |
| Asthma                         | Massage                               | unclear      |          |      |
| Colic                          | Spinal manipulation                   |              | negative |      |
| Colic                          | Cranial OMT                           | favorable    |          |      |
| Colic                          | Massage                               | favorable    |          |      |
| Nocturnal Enuresis             | Spinal manipulation                   | favorable    |          |      |
| Otitis media                   | OMT                                   | unclear      |          |      |
